# Supplementary material
Source: HighWire-hosted journal article supplement (https://www.life-science-alliance.org/content/5/11/e202201557/F5)
Supplement: inline-supplementary-material-3 [file inline-supplementary-material-3.pdf]

## Source Data\_Figure 3

Fig 3A

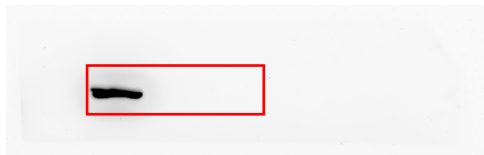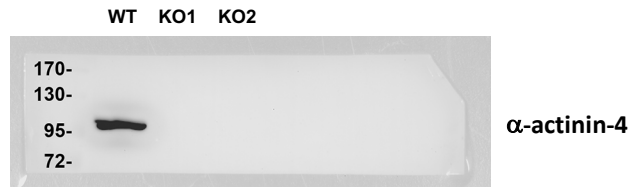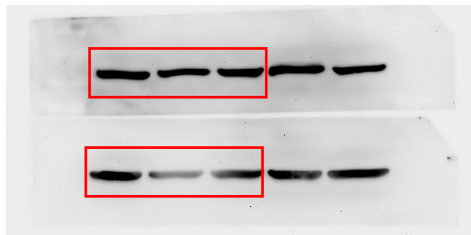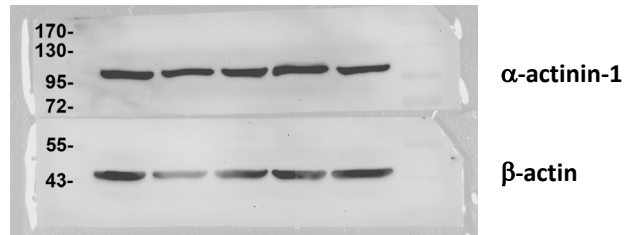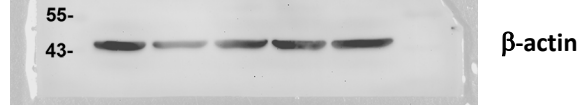

(merged)
